# Supplementary material for: Towards a machine-learning assisted non-invasive classification of dengue severity using wearable PPG data: a prospective clinical study
Source: PubMed Central journal article supplement (PMC11167237; doi:10.1016/j.ebiom.2024.105164), 2024-05-29

**a**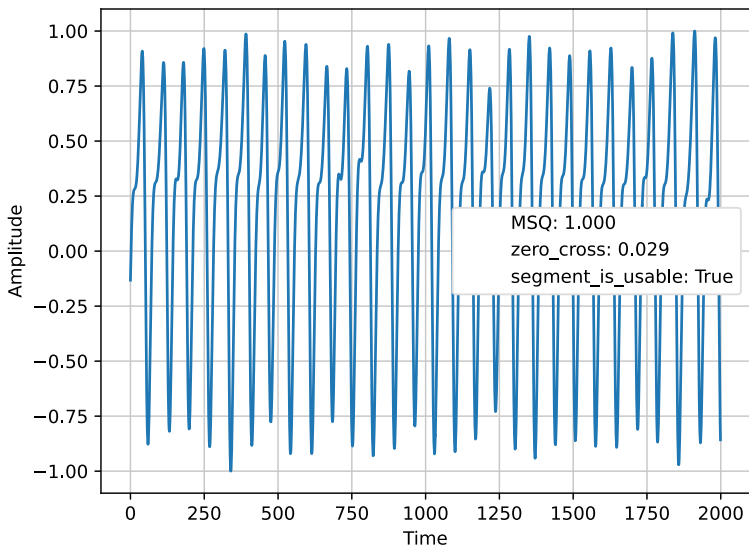**b**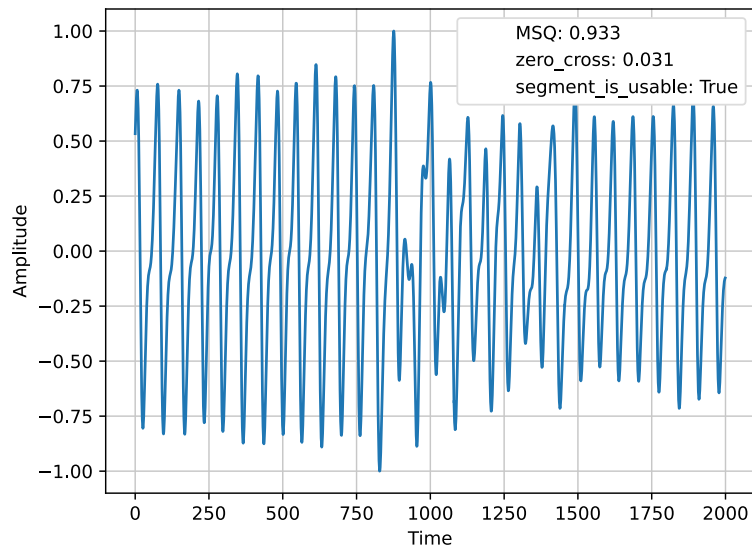**c**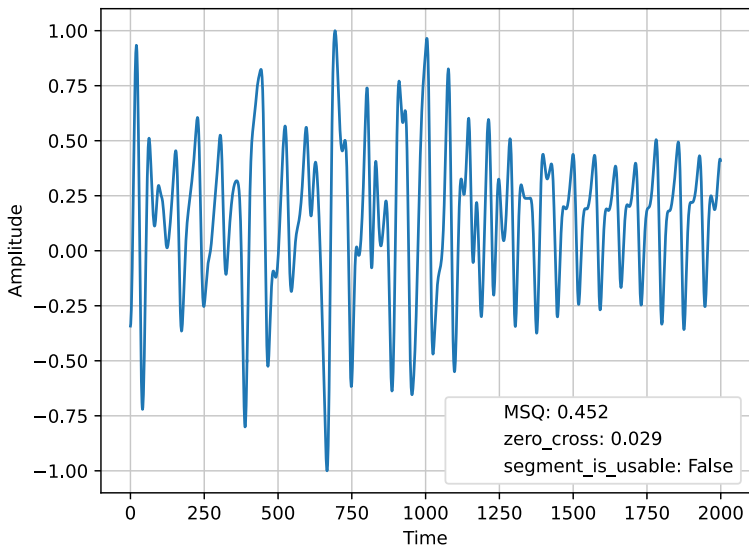**d**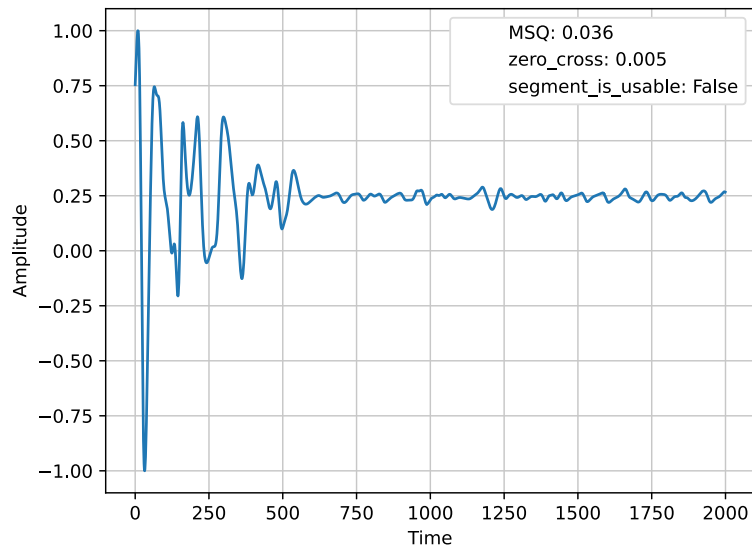

Supplement: mmc3.pdf [file mmc3.pdf]
